# Supplementary material for: A cholesterogenic gene signature for predicting the prognosis of young breast cancer patients
Source: PubMed Central journal article supplement (PMC9393010; doi:10.7717/peerj.13922), 2022-08-18

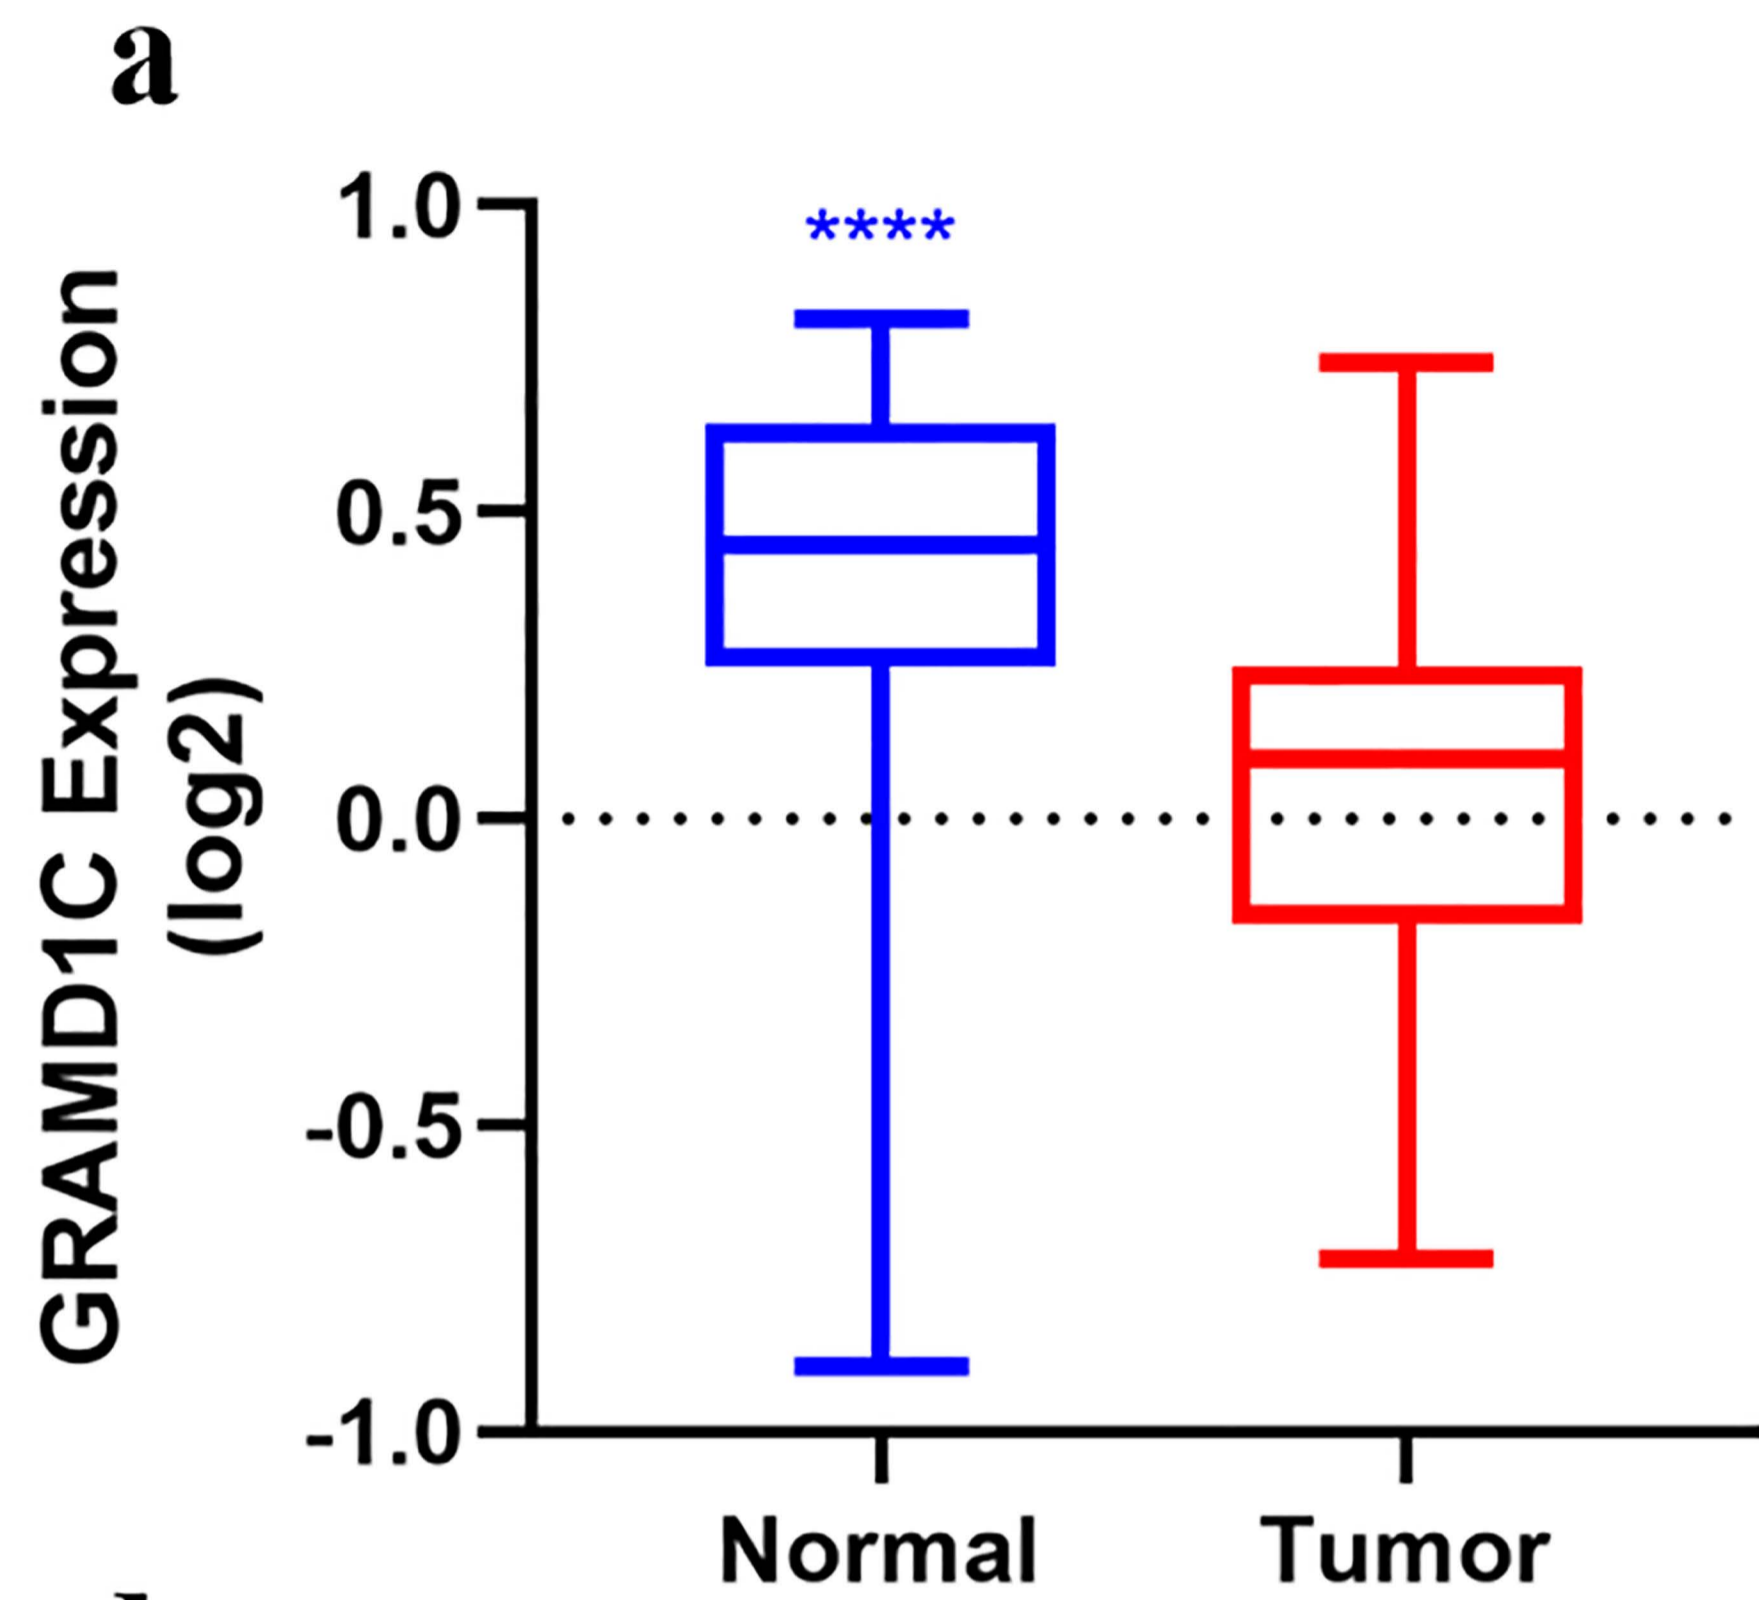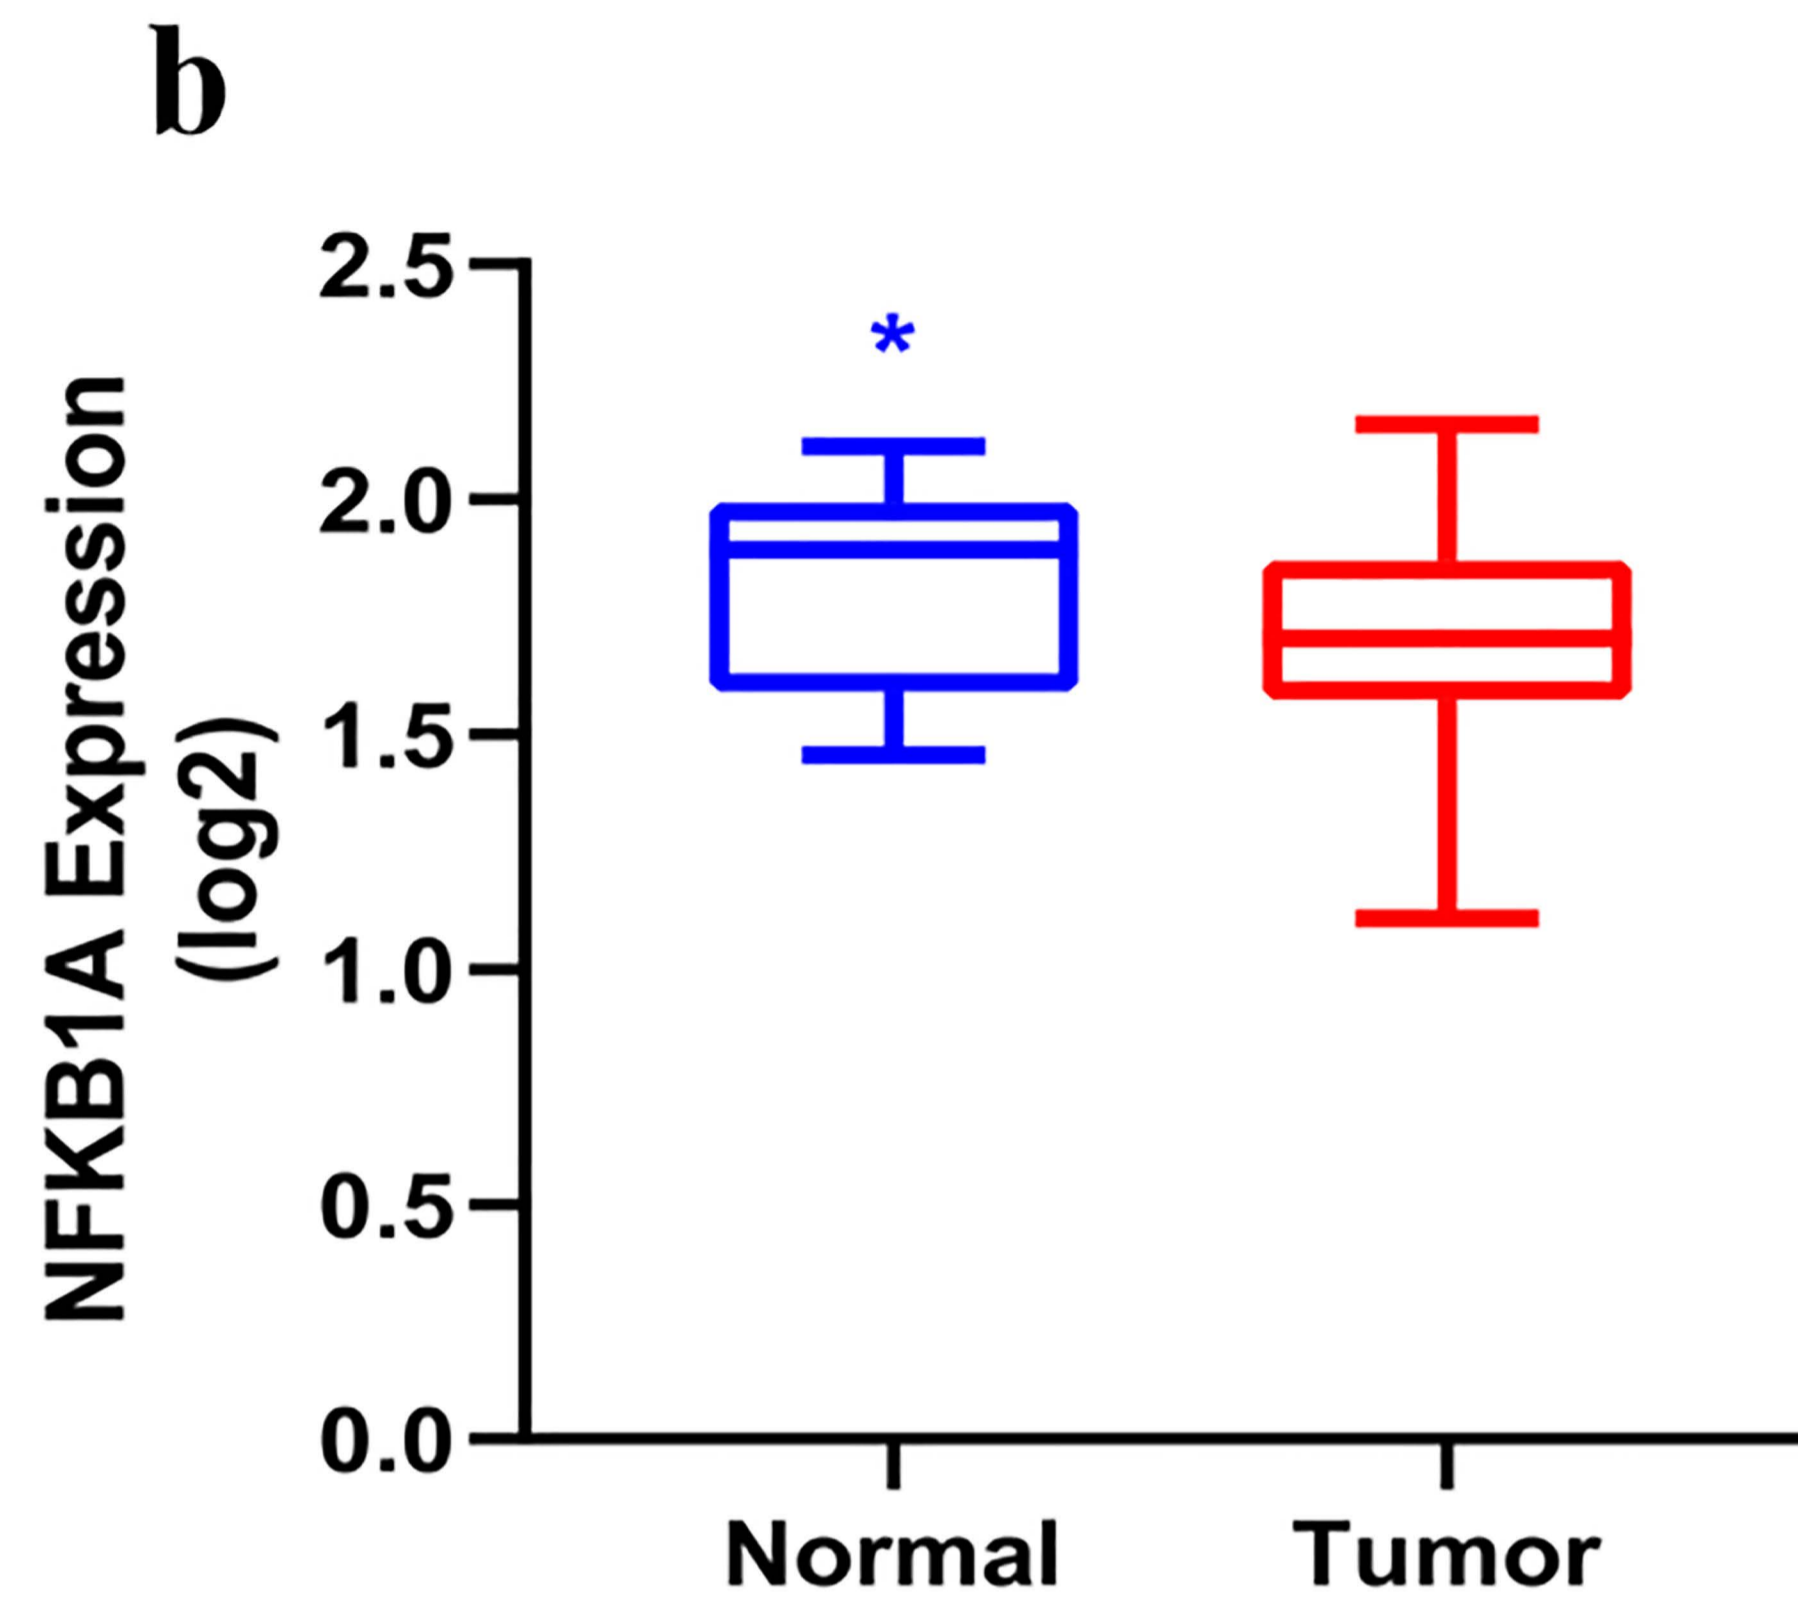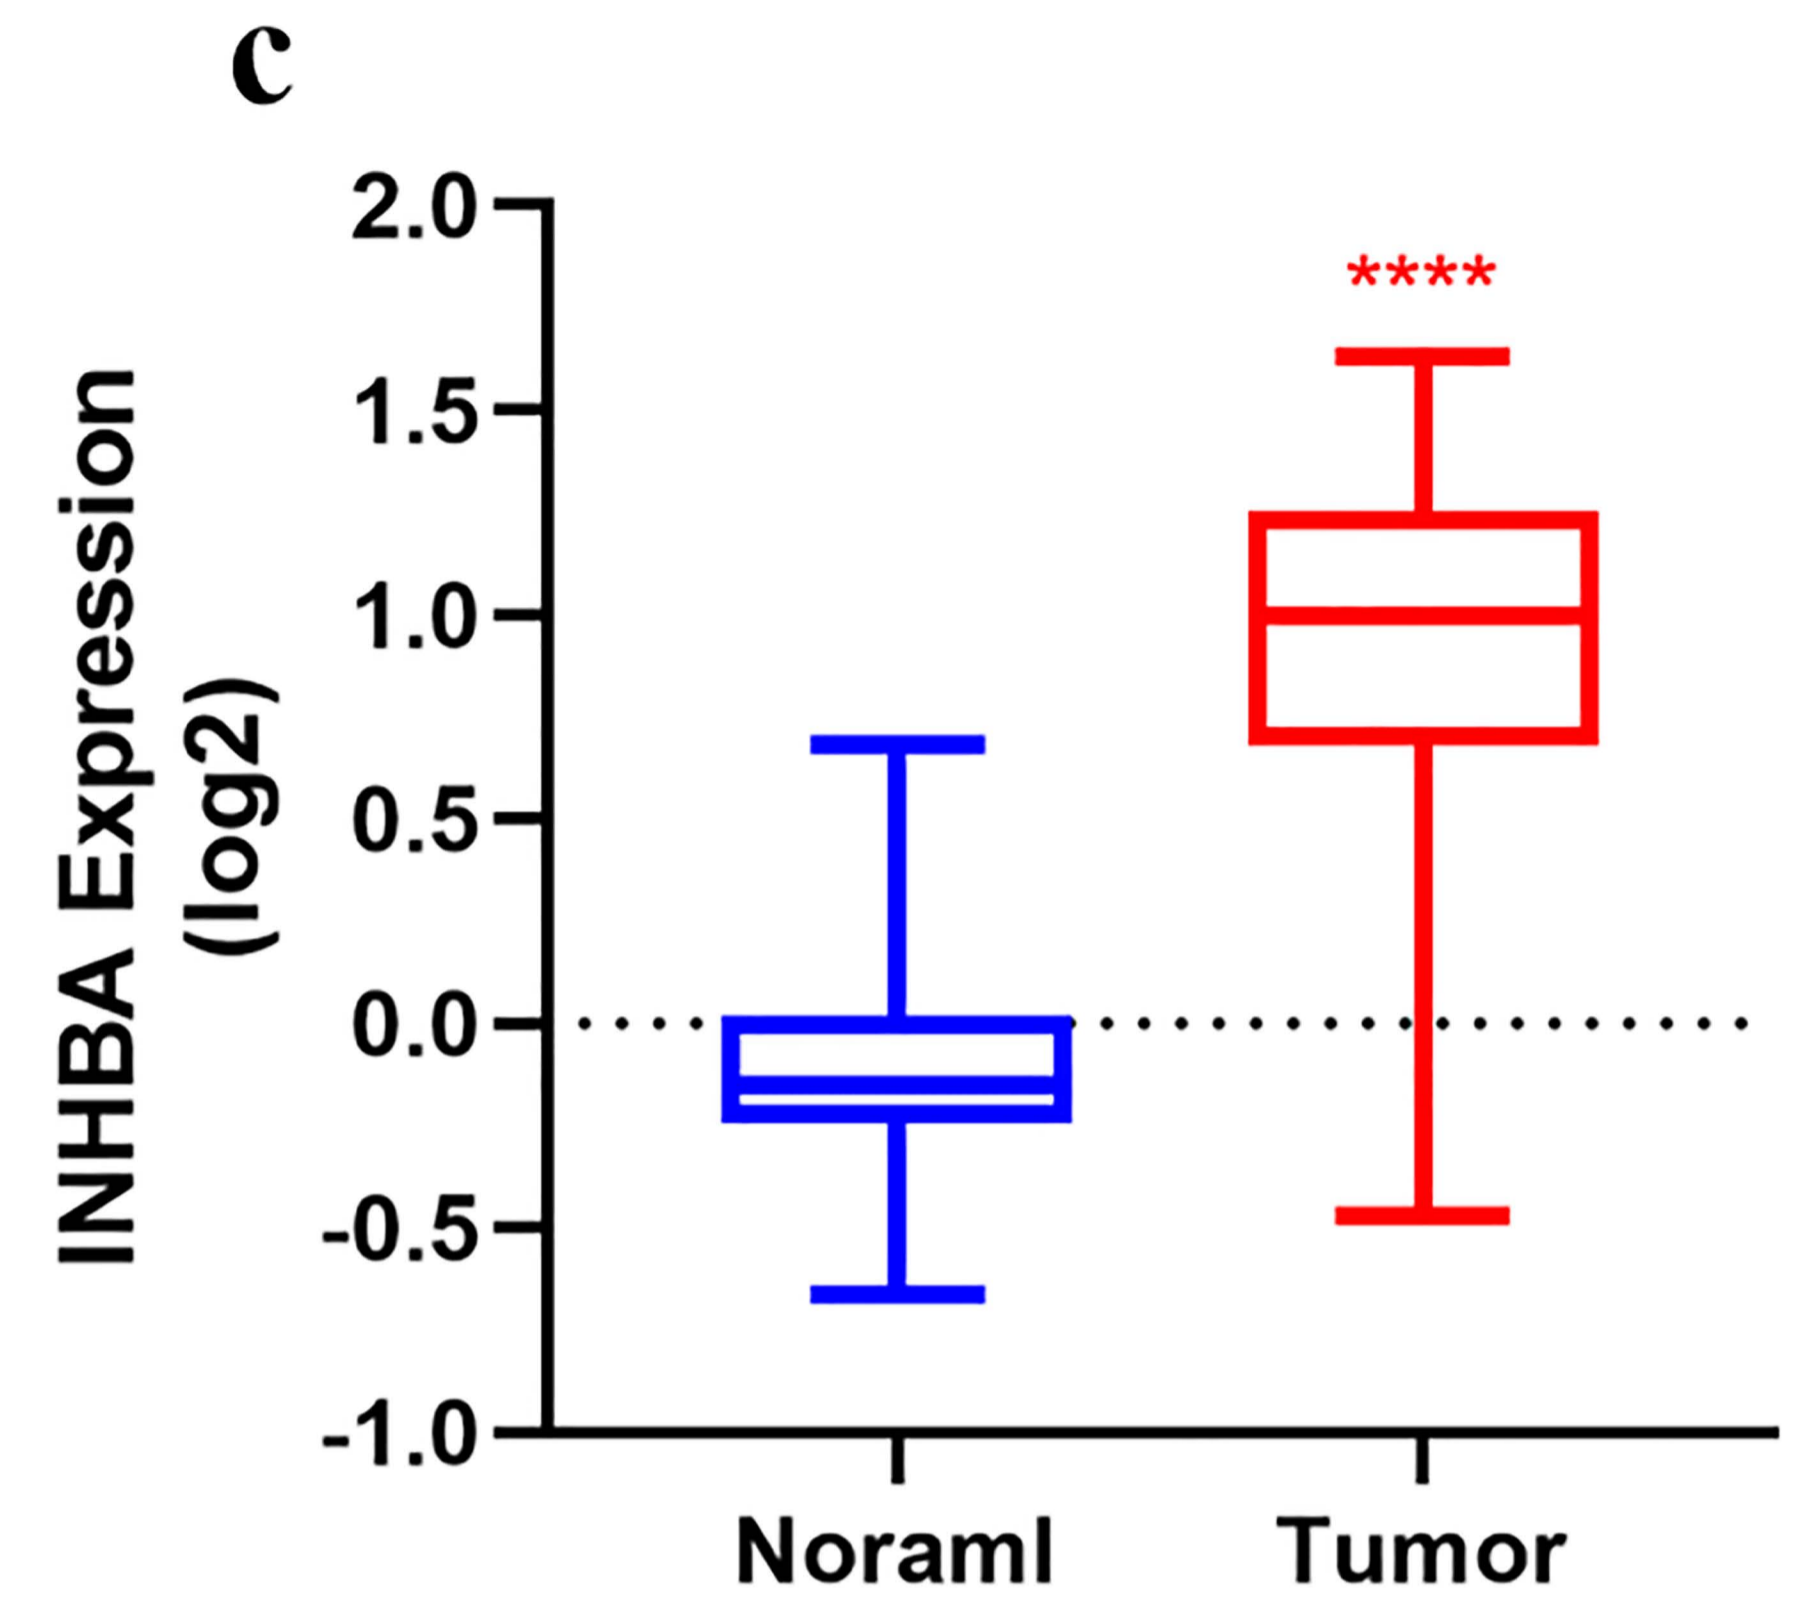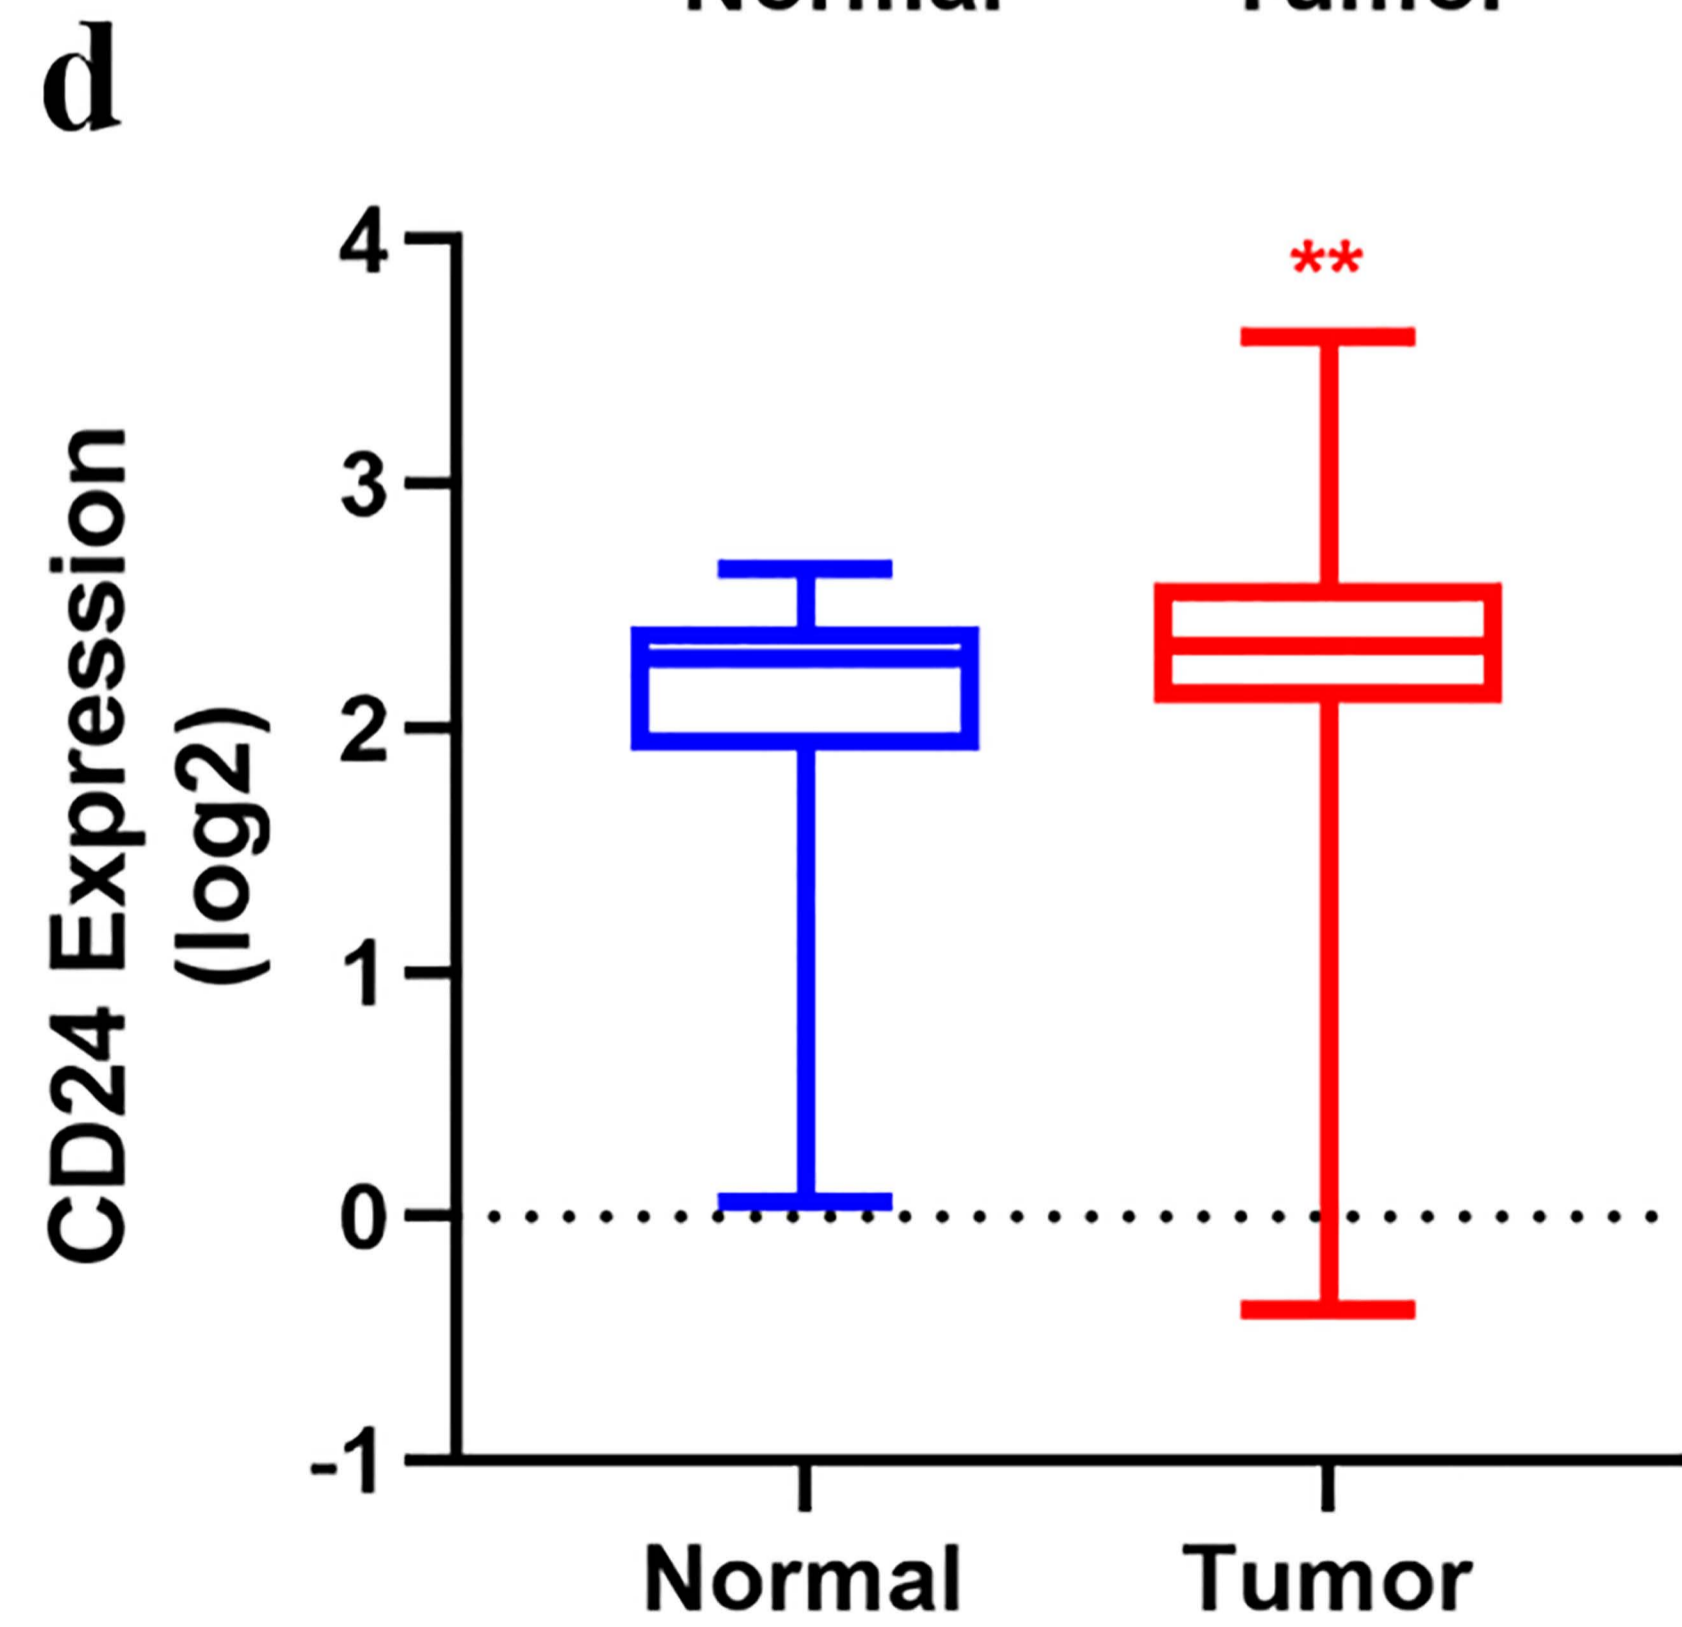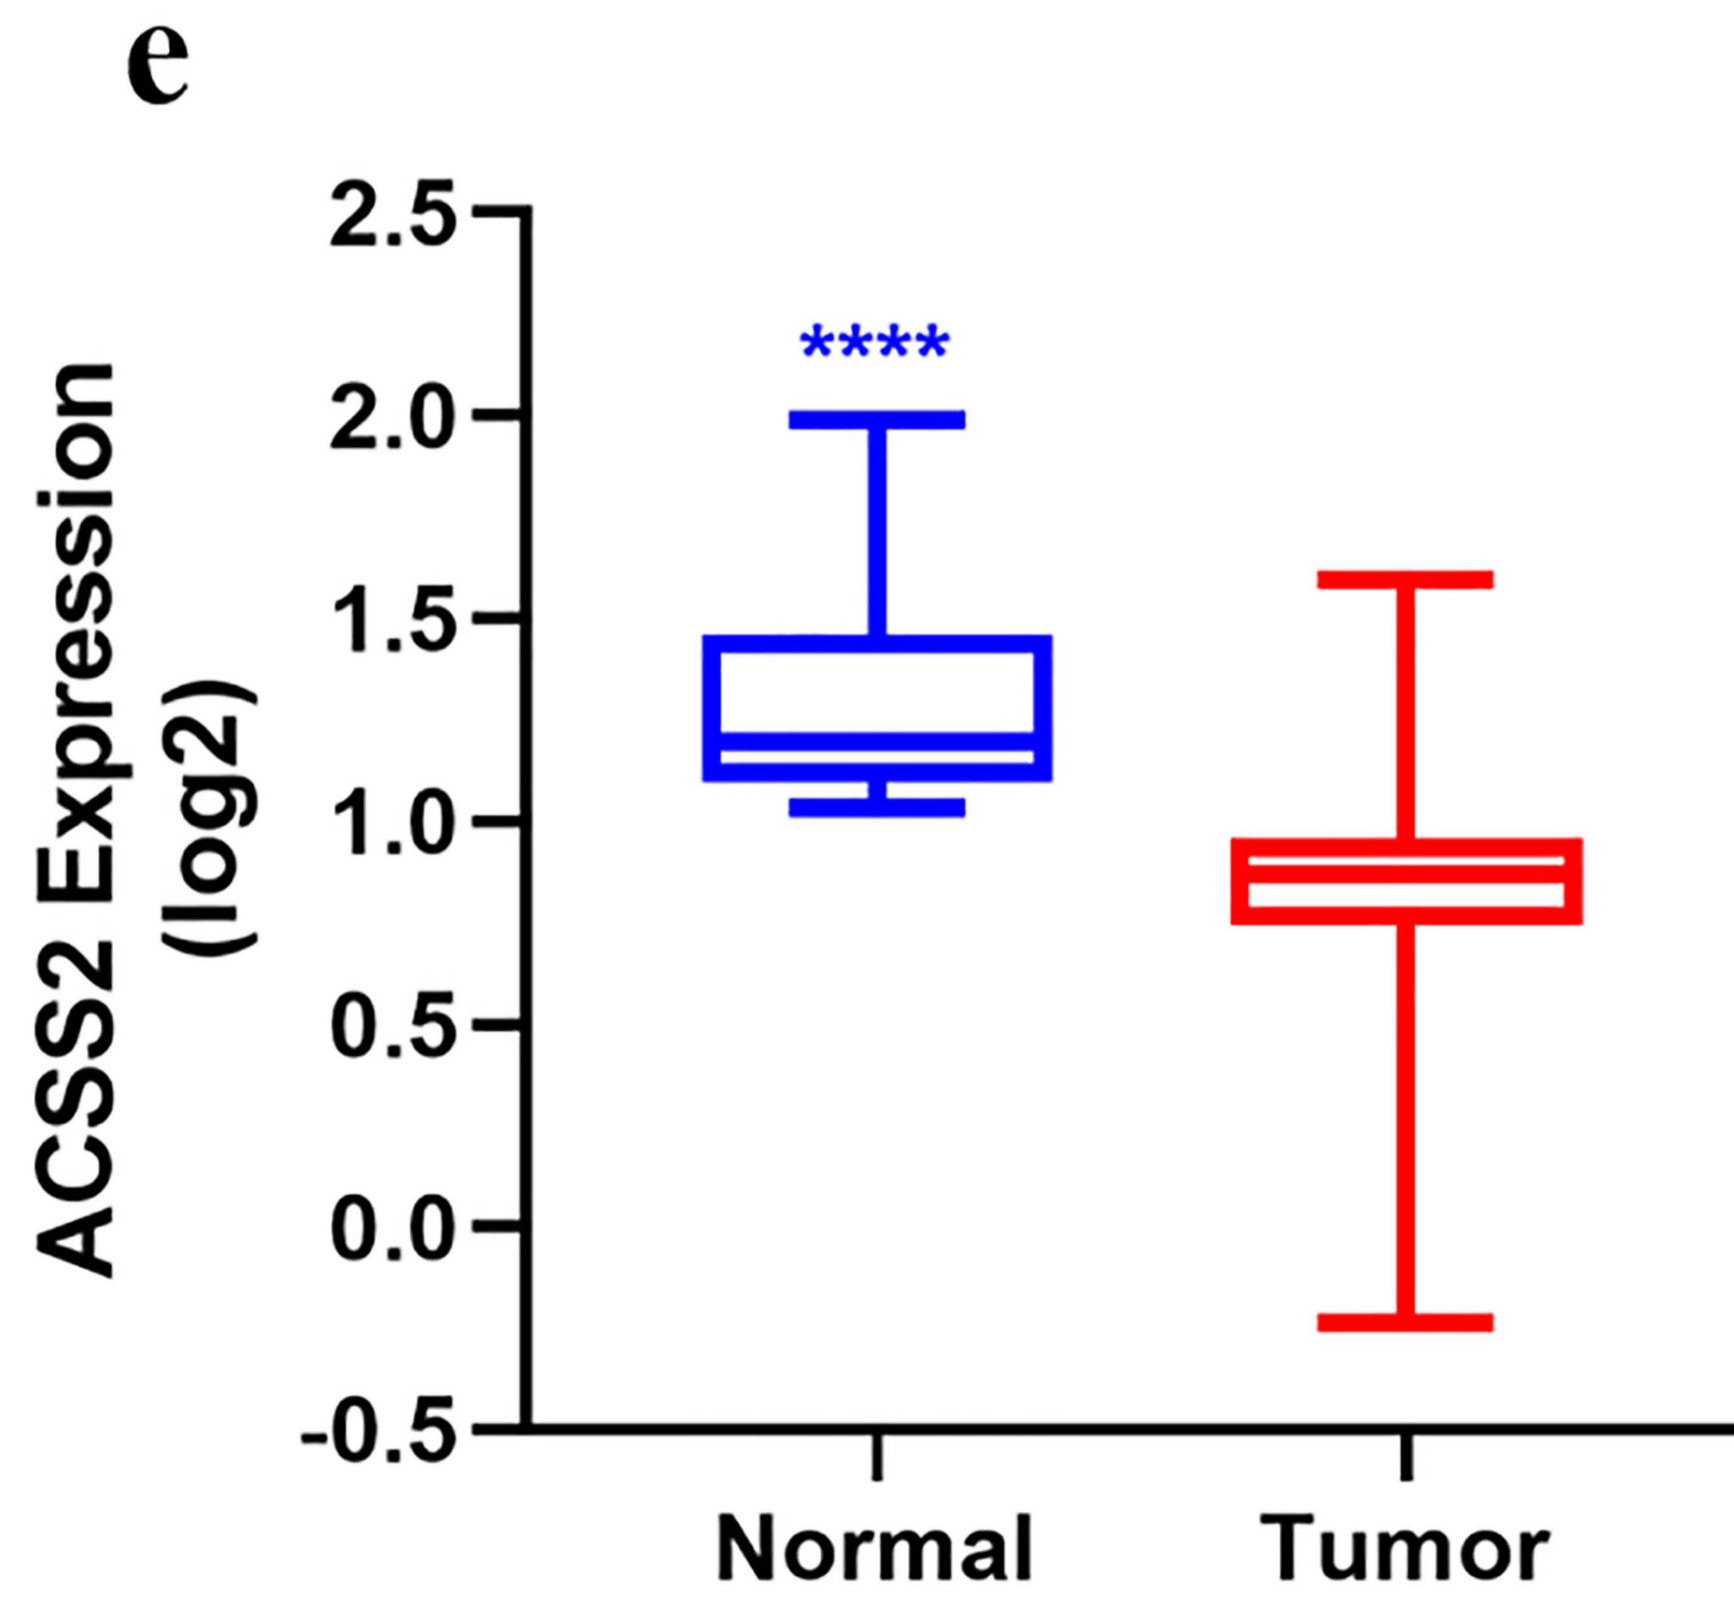

Supplement: peerj-10-13922-s003.pdf [file peerj-10-13922-s003.pdf]
