# Supplementary material for: A cholesterogenic gene signature for predicting the prognosis of young breast cancer patients
Source: PeerJ journal article supplement (doi:10.7717/peerj.13922), 2022-08-18

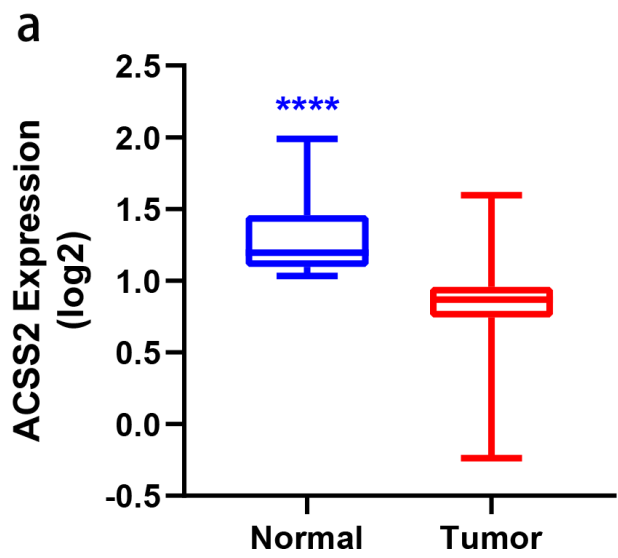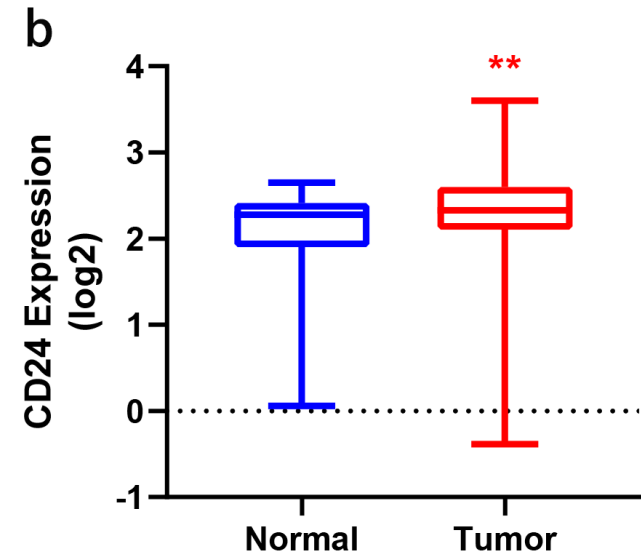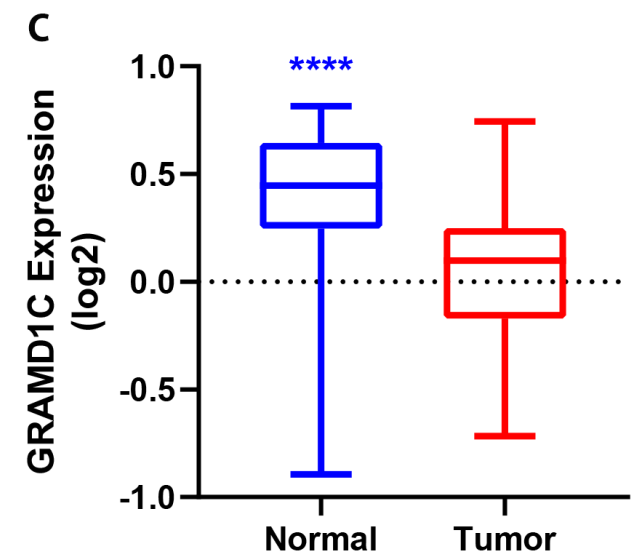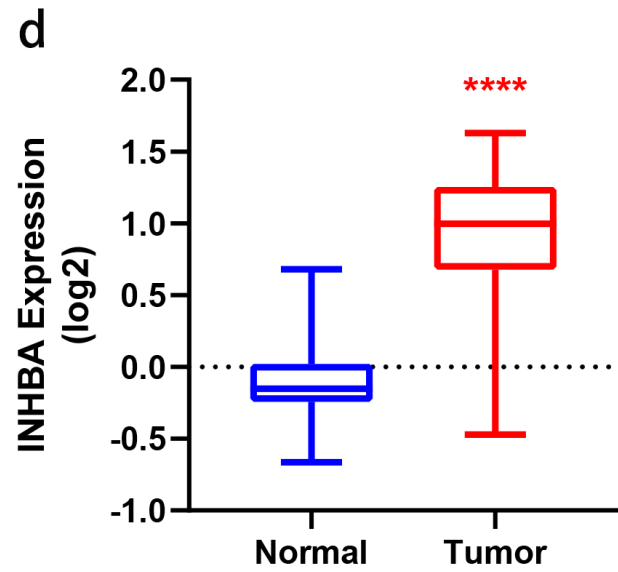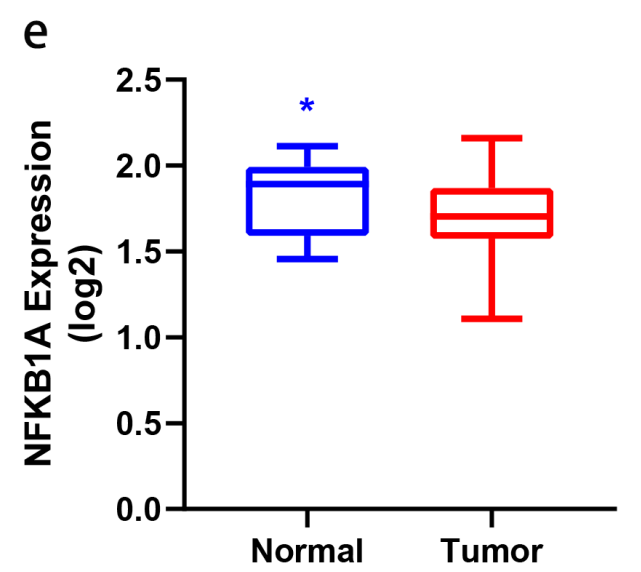

Supplement: Supplemental_fig2.pdf [file Supplemental_fig2.pdf]
